# Supplementary material
Source: HighWire-hosted journal article supplement (https://bmjopen.bmj.com/content/12/9/e057048)
Supplement: inline-supplementary-material-3 [file inline-supplementary-material-3.pdf]

### Supplementary file 3: Databases

**InterMutualistic Agency (IMA):** The IMA collects, manages, and stores the data of the seven Belgian health insurance institutions. Examples of data are percentages of people age 75 or more with chronic illnesses, percentage of people aged 65 or more which make use of day care. The IMA Atlas (website) is an open-source database with health contextual factors. IMA analyzes the data on its own initiative or at the request of other partners. Its aim is to preserve or to improve the performance, the quality, and the accessibility of the Belgian health care system and health insurance.

**Local Statistics:** The Local Statistics website is a joint venture between the Study Center of the Flemish Government, the Agency for Local Government, the Association of Flemish Cities and Municipalities, the Association of Flemish Provinces and the Flemish Community Commission of Brussels. It is a portal site where all types of statistics about local and provincial administrations such as number of people aged 65 and more, total resources of the community social security in euros per inhabitant 2013 (in euro) have been collected. Databases from various policy domains of the Flemish government are brought together.

**Social Map:** The Social Map database collects data from health care organizations (broad interpretation) in a structured database. It contains contact details, qualitative information such as target groups, opening hours, etc. Social Map aims to guide people in need of specific care to the appropriate organization
